# Supplementary material for: Deletion of neural estrogen receptor alpha induces sex differential effects on reproductive behavior in mice
Source: PubMed Central journal article supplement (PMC9021208; doi:10.1038/s42003-022-03324-w), 2022-04-20
Supplement: 42003_2022_3324_MOESM2_ESM.pdf [file 42003_2022_3324_MOESM2_ESM.pdf]

Trouillet et al., 2022. Communications Biology. Supplementary information.

**Title:** Deletion of neural estrogen receptor alpha induces sex differential effects on reproductive behavior in mice

**Authors:**

Anne-Charlotte Trouillet, Suzanne Ducroq, Lydie Naulé, Daphné Capela, Caroline Parmentier, Sally Radovick, Hélène Hardin-Pouzet, Sakina Mhaouty-Kodja

**SUPPLEMENTARY INFORMATION**

**Content:**

Supplementary Figure 1, relative to Figure 1

Supplementary Figure 2

Supplementary Figure 3

Supplementary Figure 4

Supplementary Table 1

Supplementary Table 2

**Supplementary Figure 1, relative to Figure 1. Uncropped gels.**

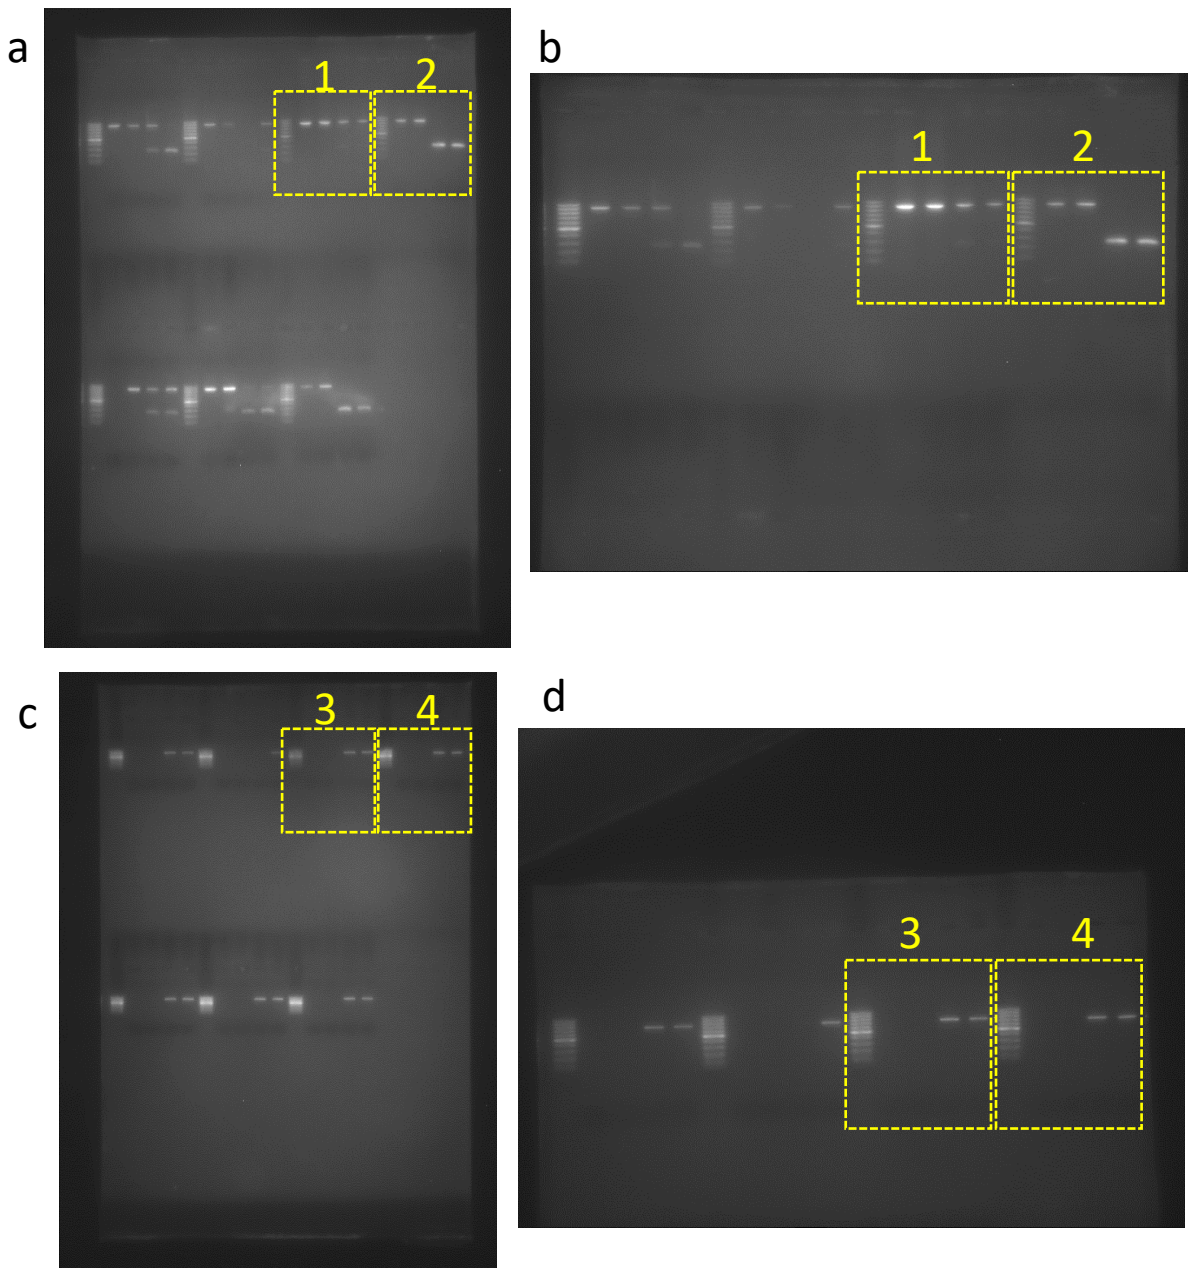

The original gel (a and c) and the original gel magnification (b and d) used to construct the figure 1a. The square labeled 1 correspond the upper left panel, the square labeled 2 to the upper right panel, the square labeled 3 to the lower left panel, and the square labeled 4 to the lower right panel.

**Supplementary Figure 2. Assessment of locomotor activity and anxiety-related behavior in gonadectomized and testosterone-supplemented  $ER^{NesCre}$  males.**

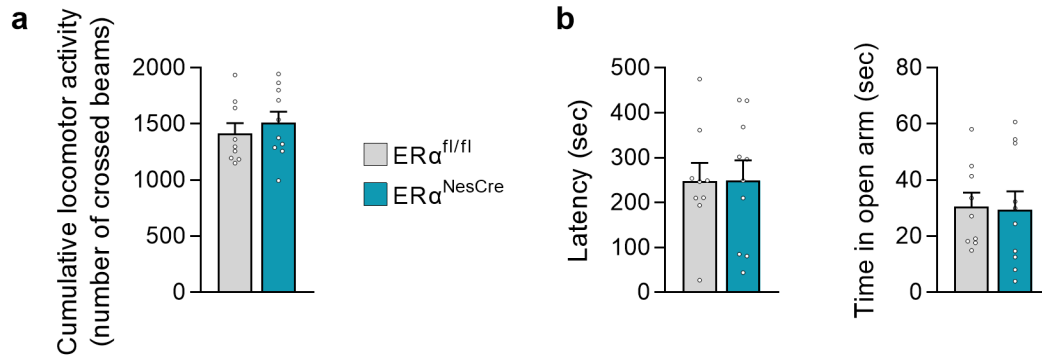

**a.** Locomotor activity during the 2 h-test for control ( $ER\alpha^{fl/fl}$ ) and mutant ( $ER\alpha^{NesCre}$ ) males ( $n = 9-10$  per genotype). **b. Left.** Latency to enter the open arms of the O-maze. **Right.** Time spent in the open arms. All data are shown as means  $\pm$  S.E.M with individual values.

**Supplementary Figure 3. Delayed puberty onset in ER<sup>NesCre</sup> females.**

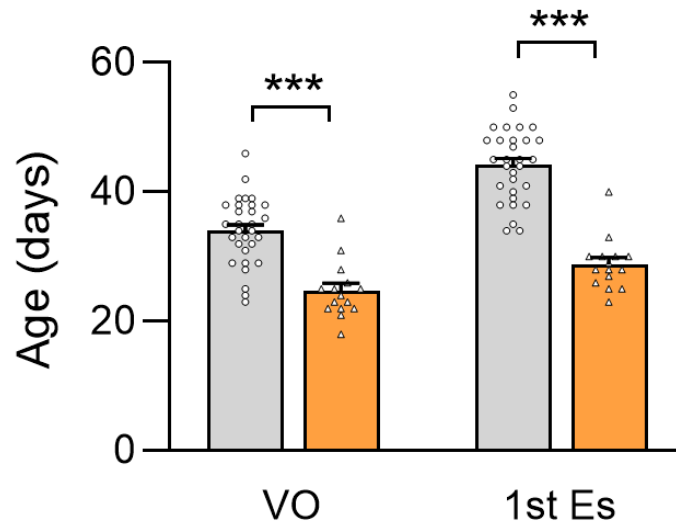

Age at vaginal opening (VO) and first estrus (1<sup>st</sup> Es) of ER<sup>fl/fl</sup> and ER<sup>NesCre</sup> females (n = 15-30 per genotype). \*\*\*p < 0.001 versus control (ER<sup>fl/fl</sup>) animals. Data are shown as means ± S.E.M with individual values.

**Supplementary Figure 4. Behavior of male stimuli during the lordosis behavior assessment of ER<sup>NesCre</sup> females.**

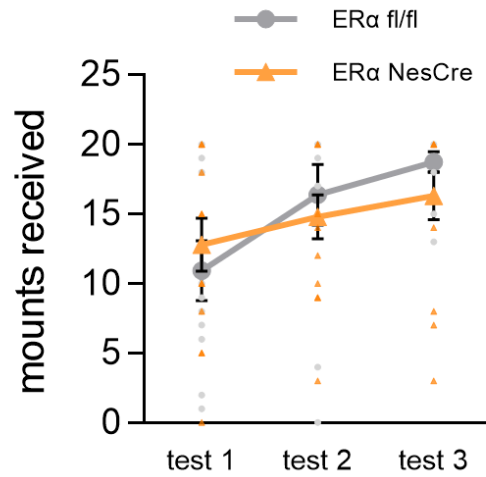

Number of mounts received during the three lordosis behavior tests of ER<sup>fl/fl</sup> and ER<sup>NesCre</sup> females (n = 11-13 per genotype). Male stimuli gave a similar amount of mounts to control and mutant females. Data are shown as means ± S.E.M with individual values.

**Supplementary Table 1. Analysis of physiological parameters in (ER $\alpha^{fl/fl}$ ) and mutant (ER $\alpha^{NesCre}$ ) females and males.**

| Genotype |                                   | ER $\alpha^{fl/fl}$ | ER $\alpha^{NesCre}$ |
|----------|-----------------------------------|---------------------|----------------------|
| Females  | Body weight (bw) (g)              | 23.99 $\pm$ 0.62    | 22.58 $\pm$ 0.49     |
|          | Ovary weight (%bw)                | 0.04 $\pm$ 0.001    | 0.03 $\pm$ 0.002**   |
|          | Uterus weight (%bw)               | 0.27 $\pm$ 0.01     | 0.73 $\pm$ 0.07***   |
|          | Estradiol levels (pg/ml)          | 46.61 $\pm$ 7.58    | 75.29 $\pm$ 9.28*    |
|          | Number of corpora lutea           | 2.45 $\pm$ 0.53     | 0                    |
| Males    | Body weight (bw) (g)              | 30.72 $\pm$ 0.74    | 29.04 $\pm$ 0.81*    |
|          | Seminal vesicle weight (%bw)      | 1.04 $\pm$ 0.05     | 1.25 $\pm$ 0.05**    |
|          | Testis weight (%bw)               | 0.65 $\pm$ 0.01     | 0.65 $\pm$ 0.02      |
|          | Testosterone levels (ng/ml)       | 5.51 $\pm$ 1.71     | 11.01 $\pm$ 1.52*    |
|          | Estradiol levels (pg/ml)          | 13.86 $\pm$ 1.95    | 8.39 $\pm$ 1.67*     |
|          | Sperm Count (10 <sup>6</sup> /mL) | 74.95 $\pm$ 9.27    | 77.31 $\pm$ 9.28     |

Data are means  $\pm$  S.E.M. for 11-12 females per genotype for body and organs weights, 7-9 females per genotype for estradiol levels, 3 females per genotype for the number of corpora lutea, 22 to 24 males per genotype for body, seminal vesicles and testis weights, 8-11 males per genotype for testosterone levels, 10-13 males per genotype for estradiol levels and 8 to 10 males per genotype for sperm count. \*p < 0.05, \*\*p < 0.01; \*\*\*p < 0.001 versus control (ER $\alpha^{fl/fl}$ ) animals.

**Supplementary Table 2. Analysis of reproductive parameters of control (AR::ER $\alpha^{fl/fl}$ ) and mutant (AR::ER $\alpha^{NesCre}$ ) males.**

| Genotype                     | AR::ER $\alpha^{fl/fl}$ | AR::ER $\alpha^{NesCre}$ |
|------------------------------|-------------------------|--------------------------|
| Body weight (bw) (g)         | 31.67 $\pm$ 1.31        | 26.97 $\pm$ 0.69*        |
| Seminal vesicle weight (%bw) | 0.95 $\pm$ 0.03         | 1.49 $\pm$ 0.18***       |
| Testis weight (%bw)          | 0.52 $\pm$ 0.04         | 0.42 $\pm$ 0.04          |
| Testosterone levels (ng/ml)  | 2.36 $\pm$ 0.57         | 4.71 $\pm$ 0.91*         |

Data are means  $\pm$  S.E.M. for 10-17 males per genotype for body and organ weight and 8-10 for testosterone levels. \*p < 0.05, \*\*\*p < 0.001 versus control (ER $\alpha^{fl/fl}$ ) animals.
