# Supplementary material for: Deletion of neural estrogen receptor alpha induces sex differential effects on reproductive behavior in mice
Source: PubMed Central journal article supplement (PMC9021208; doi:10.1038/s42003-022-03324-w), 2022-04-20
Supplement: 42003_2022_3324_MOESM3_ESM.pdf [file 42003_2022_3324_MOESM3_ESM.pdf]

## Description of Additional Supplementary Files

**File name:** Supplementary Data 1

**Description:** Source data.
